# Supplementary material for: Screening in High Schools to Identify, Evaluate, and Lower Depression Among Adolescents: A Randomized Clinical Trial
Source: PubMed Central journal article supplement (PMC8571659; doi:10.1001/jamanetworkopen.2021.31836), 2021-11-05
Supplement: jamanetwopen-e2131836-s003.pdf [file jamanetwopen-e2131836-s003.pdf]

## Data Sharing Statement

Sekhar. Screening in High Schools to Identify, Evaluate, and Lower Depression Among Adolescents. *JAMA Netw Open*. Published November 05, 2021.

doi:10.1001/jamanetworkopen.2021.31836

### Data

**Data available:** Yes

**Data types:** Deidentified participant data, Data dictionary

**How to access data:** [dsekhar@pennstatehealth.psu.edu](mailto:dsekhar@pennstatehealth.psu.edu)

**When available:** beginning date: 12-01-2022

### Supporting Documents

**Document types:** None

### Additional Information

**Who can access the data:** Researchers whose proposed use of the data has been approved.

**Types of analyses:** For any purpose.

**Mechanisms of data availability:** After proposed use of data is approved.
